# Supplementary material for: Ancestral neural circuits potentiate the origin of a female sexual behavior
Source: PubMed Central journal article supplement — bioRxiv. 2023 Dec 7:2023.12.05.570174. Preprint. [Version 1] doi: 10.1101/2023.12.05.570174 (PMC10723342; doi:10.1101/2023.12.05.570174), 2023-12-07
Supplement: media-2.pdf [file media-2.pdf]

| <b>Figure</b>                                  | <b>Species</b>                   | <b>Strains</b>                                                                               |
|------------------------------------------------|----------------------------------|----------------------------------------------------------------------------------------------|
| Figs. 1a-f, 2, 3, 6<br>Extended Data Figs. 1-3 | <i>D. santomea</i>               | STO4                                                                                         |
| Fig. 1g                                        | <i>D. santomea</i>               | 18CAR05-10                                                                                   |
| Fig. 1g                                        | <i>D. santomea</i>               | 18TRNE01-05                                                                                  |
| Fig. 1g                                        | <i>D. santomea</i>               | Q1-02                                                                                        |
| Figs. 2a, 6                                    | <i>D. yakuba</i>                 | 14021-0261.02                                                                                |
| Fig. 1g                                        | <i>D. yakuba</i>                 | 3-41                                                                                         |
| Fig. 1g                                        | <i>D. yakuba</i>                 | 4-72                                                                                         |
| Fig. 1g                                        | <i>D. yakuba</i>                 | 1-03                                                                                         |
| Fig. 1g                                        | <i>D. yakuba</i>                 | 2-0F11                                                                                       |
| Figs. 1g, 2a, 5h,i, 6                          | <i>D.melanogaster</i>            | Canton S                                                                                     |
| Figs. 1g, 6                                    | <i>D. simulans</i>               | sim5                                                                                         |
| Figs. 1g, 6                                    | <i>D. teissieri</i>              | 14021-0257.01                                                                                |
| Figs. 1g, 6                                    | <i>D. erecta</i>                 | 14021-0224.01                                                                                |
| Fig. 4a-i                                      | <i>D. santomea</i>               | sanw; ; Otd-Flp (2253), <i>dsx</i> -GAL4/FRT-stop-FRT-CsChrimson:mVenus (2253)               |
| Fig. 4a-i                                      | <i>D.melanogaster</i>            | w1118; Otd-Flp (attP40)/+; <i>dsx</i> -GAL4/FRT-stop-FRT-CsChrimson:mVenus (vk5)             |
| Extended Data Fig. 4a,b                        | <i>D. yakuba</i>                 | yakw; FRT-stop-FRT-CsChrimson:mVenus (2180)/+; <i>dsx</i> -GAL4/Otd-Flp (2285)               |
| Fig. 4a-i                                      | <i>D. yakuba</i>                 | yakw; FRT-stop-FRT-CsChrimson:mVenus (2180)/+; <i>dsx</i> -GAL4/Otd-Flp (2285)               |
| Extended Data Fig. 4c,d                        | <i>D.melanogaster</i>            | vpoDN-SS2: 20xUAS-CsChrimson-mVenus (attP18)/w1118; 45670-AD(p40)/Cyo; 52F12-DBD(p2)=ss50795 |
| Fig. 5a-h                                      | <i>D.melanogaster</i>            | vpoDN-SS2: 20xUAS-CsChrimson-mVenus (attP18)/w1118; 45670-AD(p40)/Cyo; 52F12-DBD(p2)=ss50795 |
| Extended Data Fig. 5a-j                        | <i>D.melanogaster</i>            | vpoDN-SS1: 20xUAS-CsChrimson-mVenus (attP18)/w1118; 31D07-AD(p40)/Cyo; 52F12-DBD(p2)=ss50200 |
| Extended Data Fig. 5a,b                        | <i>D.melanogaster</i>            | vpoDN-SS1: 20xUAS-CsChrimson-mVenus (attP18)/w1118; 31D07-AD(p40)/Cyo; 52F12-DBD(p2)=ss50200 |
| Extended Data fig. 5a,b                        | <i>D.melanogaster</i>            | vpoDN-SS3: 20xUAS-CsChrimson-mVenus (attP18)/w1118;45670-AD(p40)/Cyo;10A09-DBD(p2)=ss53451   |
| Fig. 6                                         | <i>D. eugracilis</i>             | 14026-0451.02                                                                                |
| Fig. 6                                         | <i>D. lucipennis</i>             | unknown                                                                                      |
| Fig. 6                                         | <i>D. biarmipes</i>              | G#224                                                                                        |
| Fig. 6                                         | <i>D. takahashii</i>             | unknown                                                                                      |
| Fig. 6                                         | <i>D. elegans</i>                | unknown                                                                                      |
| Fig. 6                                         | <i>D. gunungola</i>              | sk                                                                                           |
| Fig. 6                                         | <i>D. kikkawai</i>               | 14028-05161.14                                                                               |
| Fig. 6                                         | <i>D. parabiptinata</i>          | VT04-70 Vietnam                                                                              |
| Fig. 6                                         | <i>D. malerkotliana</i>          | C1Z19-L9                                                                                     |
| Fig. 6                                         | <i>D. ananassae</i>              | 14024-0371.13                                                                                |
| Fig. 6                                         | <i>D. biptinata</i>              | THT 08 Taiwan                                                                                |
| Fig. 6                                         | <i>D. pseudoananassae</i>        | R186 Puerto Princessa                                                                        |
| Fig. 6                                         | <i>D. pseudoobscura</i>          | 14022-0121.94                                                                                |
| Fig. 6                                         | <i>D. willistoni</i>             | 14030-0814.24                                                                                |
| Fig. 6                                         | <i>D. ezoana</i>                 | 15010-0971.00                                                                                |
| Fig. 6                                         | <i>D. mojaviensis wrightleyi</i> | 15081-1352.22                                                                                |
| Fig. 6                                         | <i>D. mercatorum</i>             | unknown                                                                                      |
